# Supplementary material for: Microbial Dysbiosis Linked to Metabolic Dysfunction-Associated Fatty Liver Disease in Asians: Prevotella copri Promotes Lipopolysaccharide Biosynthesis and Network Instability in the Prevotella Enterotype
Source: MDPI journal article supplement (doi:10.3390/ijms25042183), 2024-02-11
Supplement: s1 [file s1]

# Supplementary Figure S1A

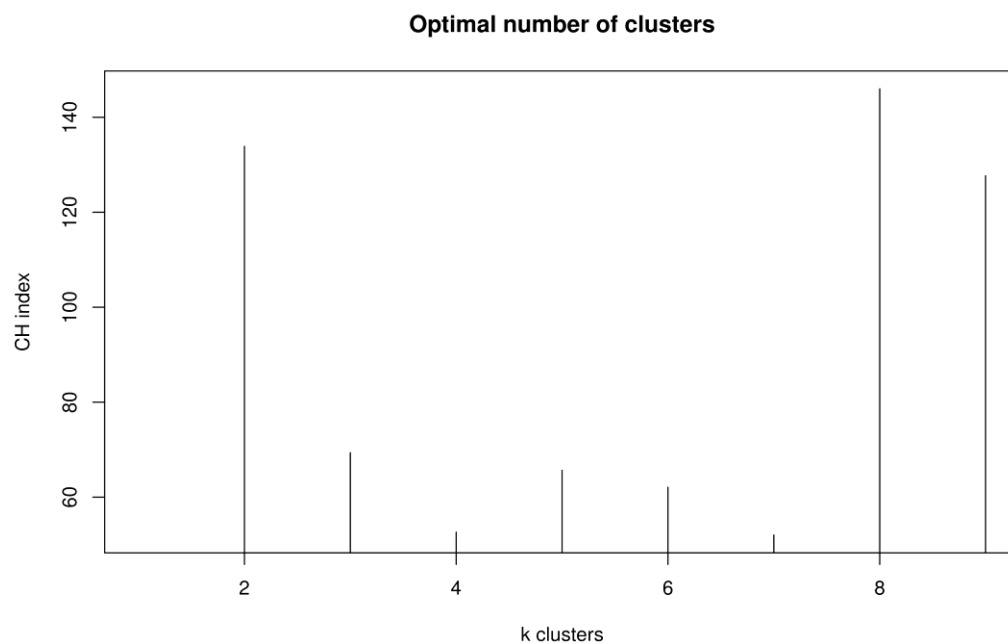

## Figure S1B

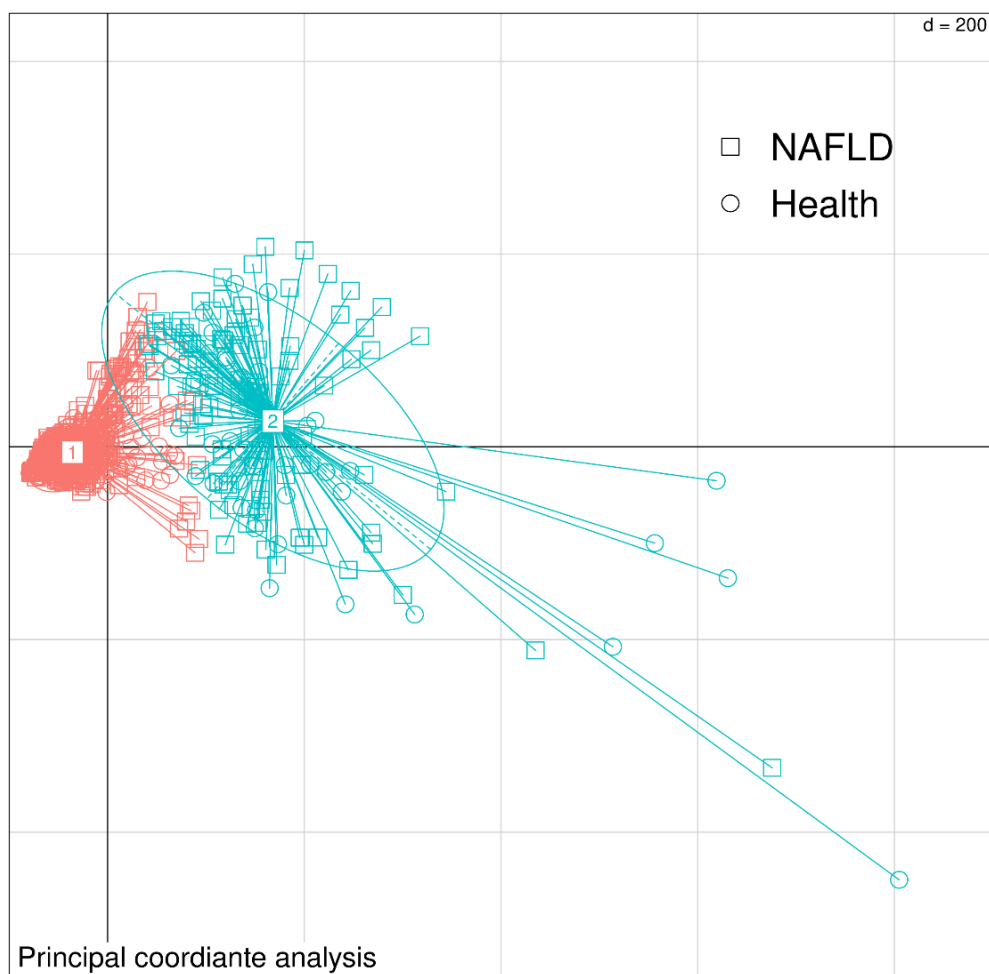

# Supplementary Figure S2A

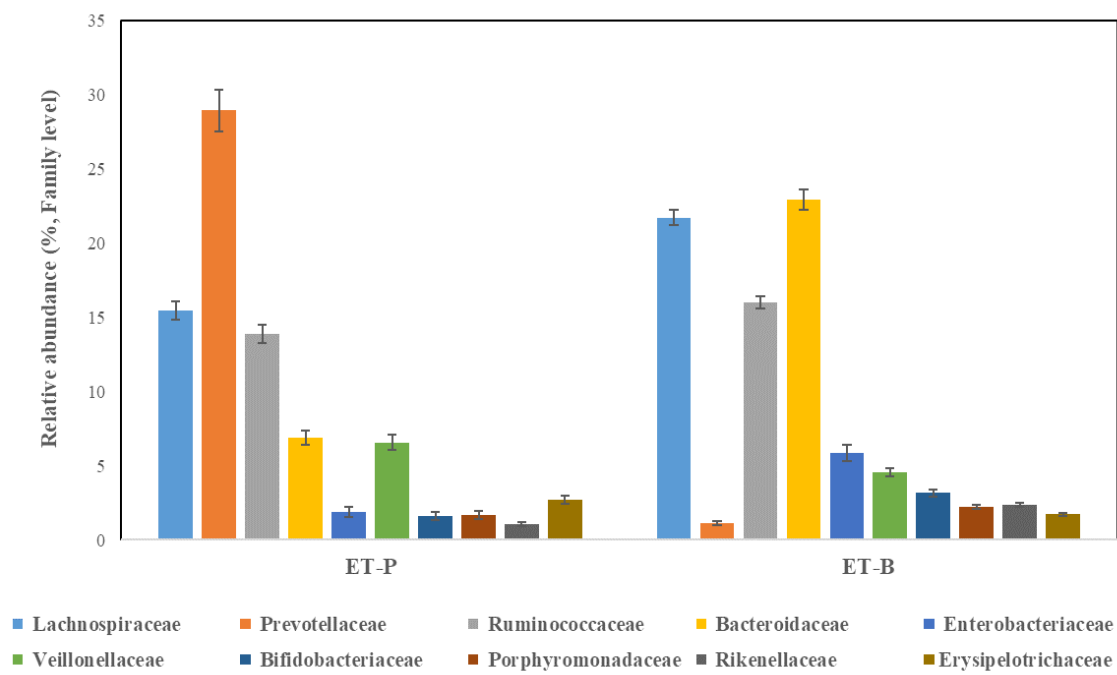

# Figure S2B

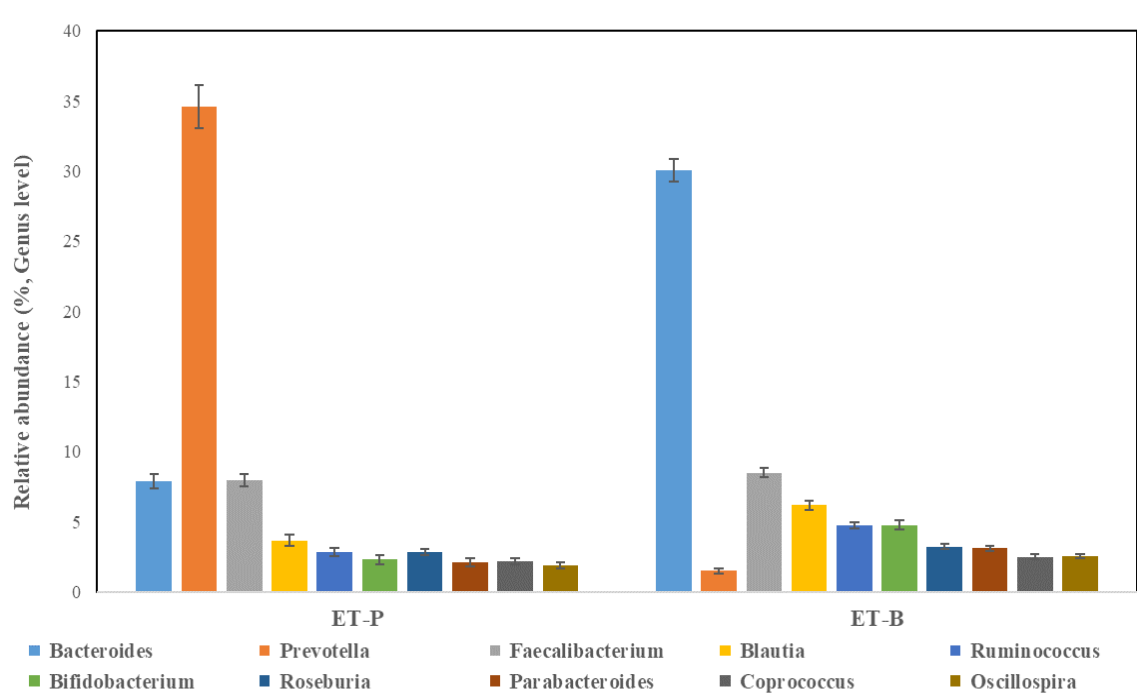

# Supplementary Figure S3

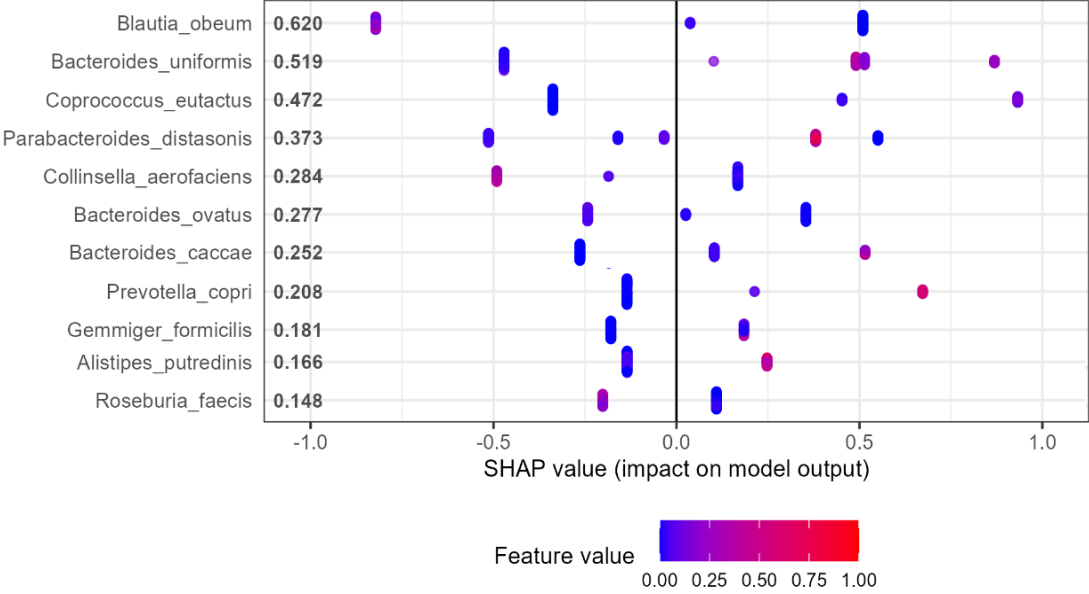

# Supplementary Figure S4

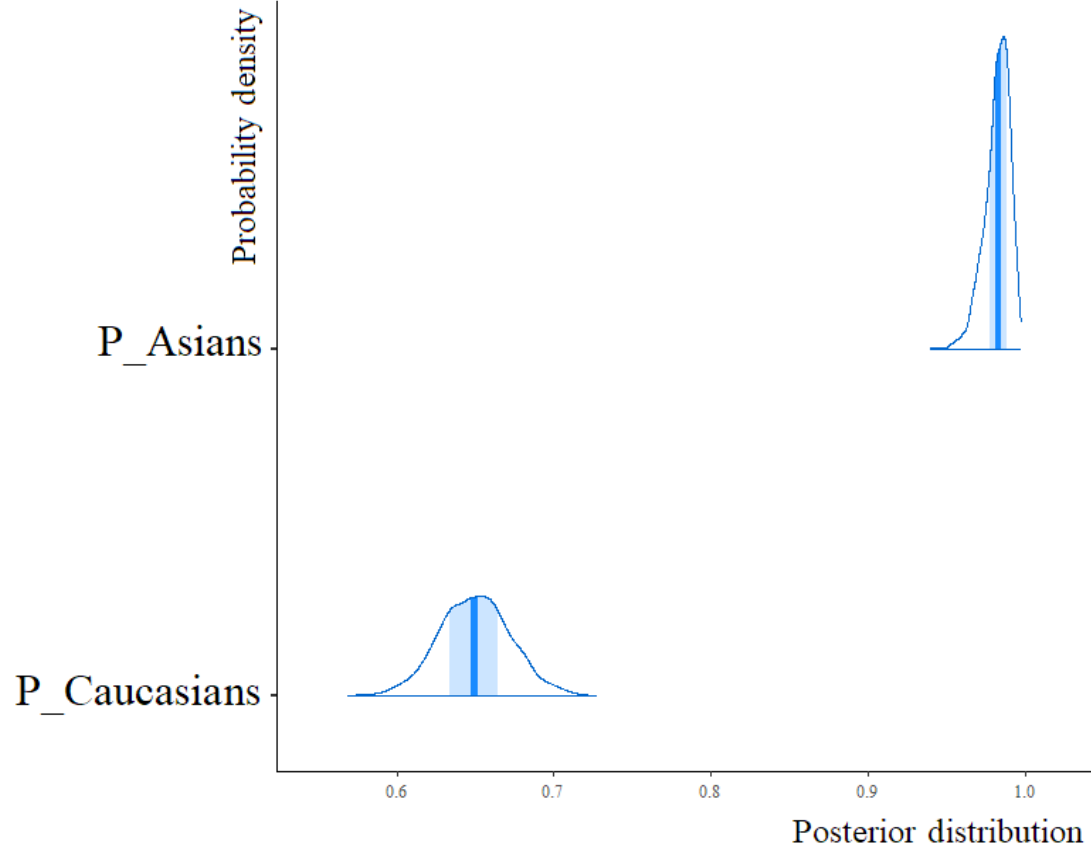

## Supplementary Figure S5

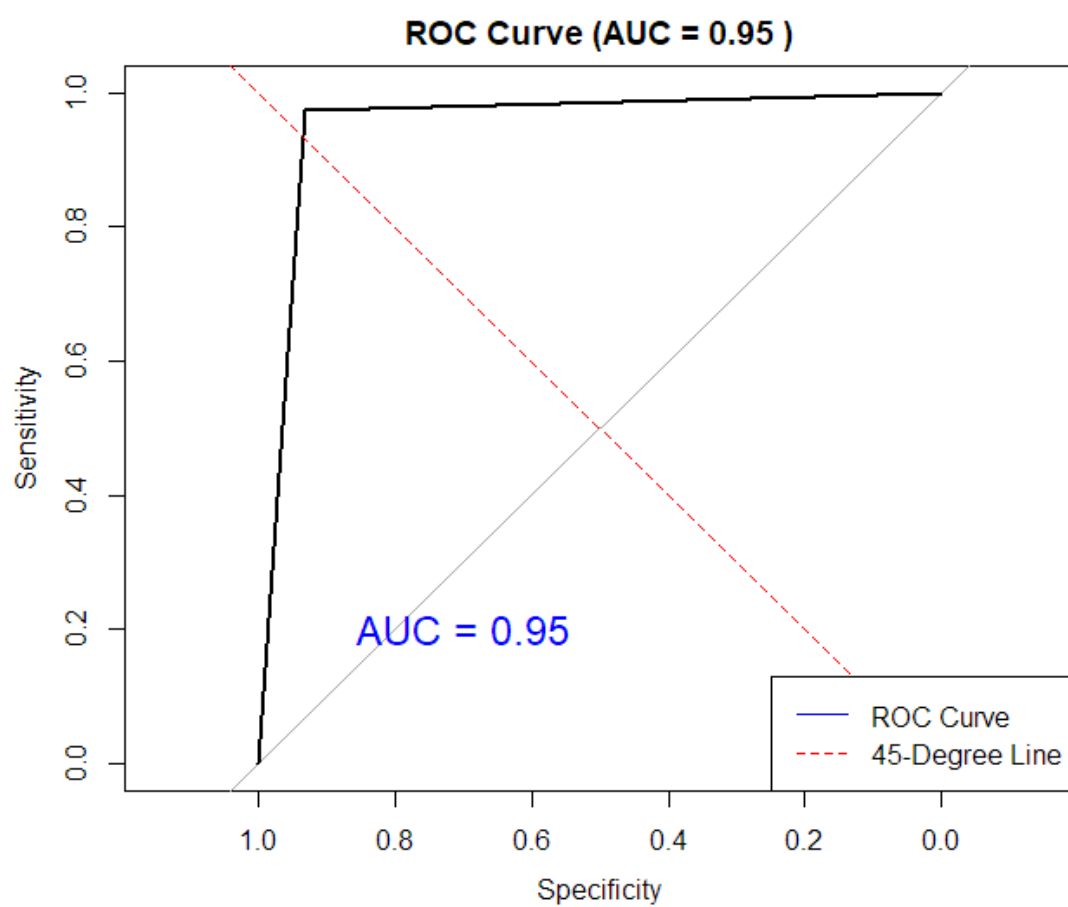

## Supplementary Figure S6

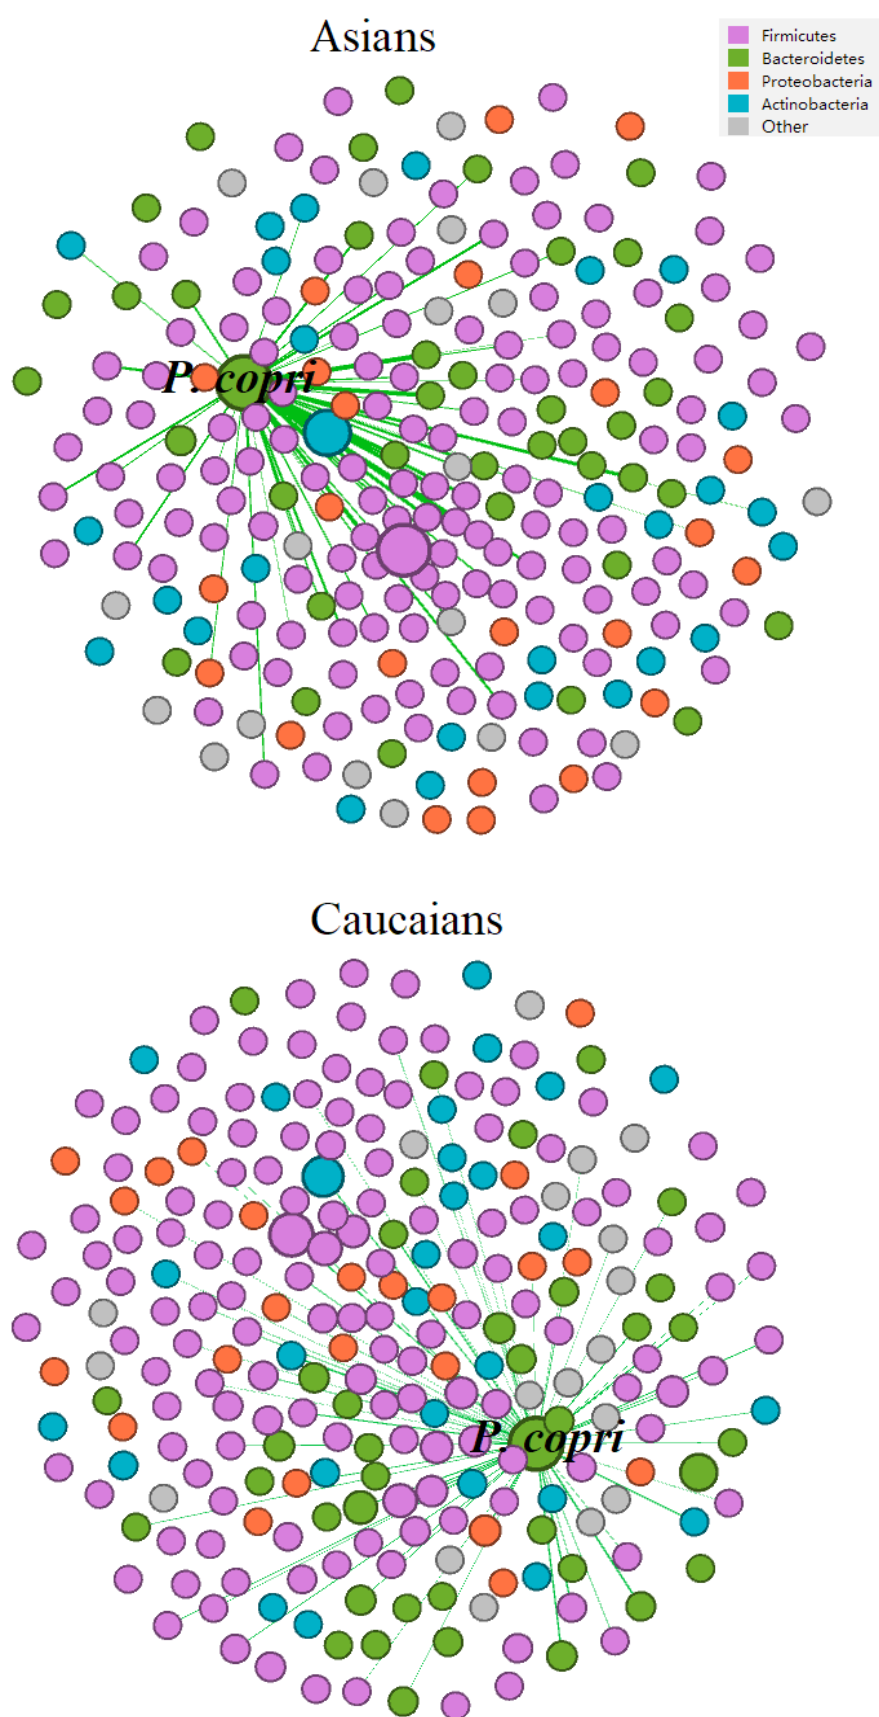

**Supplementary table S1. Performance data for XGBoost machine learning.**

|      | Specificity | Specificity | Sensitivity | ROC AUC   |
|------|-------------|-------------|-------------|-----------|
| ET-B | 0.8266667   | 0.7478788   | 0.837607    | 0.7455556 |
| ET-P | 0.9923664   | 1           | 0.990446    | 0.9890937 |

**Supplementary table S2. Detailed clinical data for each sample.**

| Project number | Sample ID  | Age | Gender | BMI     | Country | Race      | Group  |
|----------------|------------|-----|--------|---------|---------|-----------|--------|
| PRJEB28350     | ERR2753669 | 52  | Female | 38.9501 | USA     | Caucasian | MAFLD  |
| PRJEB28350     | ERR2753670 | 71  | Female | 31.0339 | USA     | Caucasian | Health |
| PRJEB28350     | ERR2753671 | 63  | Female | 34.8643 | USA     | Caucasian | MAFLD  |
| PRJEB28350     | ERR2753672 | 63  | Female | 33.5616 | USA     | Caucasian | MAFLD  |
| PRJEB28350     | ERR2753673 | 61  | Female | 42.6692 | USA     | Caucasian | MAFLD  |
| PRJEB28350     | ERR2753674 | 40  | Female | 29.1277 | USA     | Caucasian | MAFLD  |
| PRJEB28350     | ERR2753675 | 41  | Female | 25.5556 | USA     | Caucasian | MAFLD  |
| PRJEB28350     | ERR2753676 | 47  | Female | 33.4223 | USA     | Caucasian | MAFLD  |
| PRJEB28350     | ERR2753677 | 64  | Female | 33.2671 | USA     | Caucasian | MAFLD  |
| PRJEB28350     | ERR2753678 | 42  | Male   | 28.3685 | USA     | Caucasian | MAFLD  |
| PRJEB28350     | ERR2753679 | 37  | Female | 30.625  | USA     | Caucasian | MAFLD  |
| PRJEB28350     | ERR2753680 | 58  | Female | 26.0792 | USA     | Caucasian | MAFLD  |
| PRJEB28350     | ERR2753681 | 61  | Female | 25.0979 | USA     | Caucasian | MAFLD  |
| PRJEB28350     | ERR2753683 | 69  | Female | 30.6712 | USA     | Caucasian | MAFLD  |
| PRJEB28350     | ERR2753684 | 39  | Male   | 30.978  | USA     | Caucasian | MAFLD  |
| PRJEB28350     | ERR2753685 | 81  | Male   | 35.8138 | USA     | Caucasian | MAFLD  |
| PRJEB28350     | ERR2753686 | 81  | Male   | 34.5629 | USA     | Caucasian | MAFLD  |
| PRJEB28350     | ERR2753687 | 78  | Female | 27.4747 | USA     | Caucasian | MAFLD  |
| PRJEB28350     | ERR2753689 | 65  | Male   |         | USA     | Caucasian | MAFLD  |
| PRJEB28350     | ERR2753690 | 38  | Male   | 24.2101 | USA     | Caucasian | Health |
| PRJEB28350     | ERR2753691 | 33  | Female | 29.3447 | USA     | Caucasian | Health |
| PRJEB28350     | ERR2753692 | 71  | Male   | 31.0085 | USA     | Caucasian | MAFLD  |
| PRJEB28350     | ERR2753694 | 68  | Male   | 28.9073 | USA     | Caucasian | MAFLD  |
| PRJEB28350     | ERR2753696 | 60  | Female | 26.6476 | USA     | Caucasian | MAFLD  |
| PRJEB28350     | ERR2753697 | 39  | Female | 56.7591 | USA     | Caucasian | Health |
| PRJEB28350     | ERR2753698 | 30  | Female | 27.4004 | USA     | Caucasian | MAFLD  |
| PRJEB28350     | ERR2753699 | 28  | Male   | 34.8027 | USA     | Caucasian | Health |
| PRJEB28350     | ERR2753700 | 66  | Female | 37.9188 | USA     | Caucasian | MAFLD  |
| PRJEB28350     | ERR2753701 | 43  | Female | 43.2341 | USA     | Caucasian | MAFLD  |
| PRJEB28350     | ERR2753702 | 33  | Male   | 103.138 | USA     | Caucasian | Health |
| PRJEB28350     | ERR2753703 | 45  | Female | 48.2878 | USA     | Caucasian | MAFLD  |
| PRJEB28350     | ERR2753704 | 42  | Female | 38.6396 | USA     | Caucasian | MAFLD  |
| PRJEB28350     | ERR2753705 | 66  | Female | 22.1631 | USA     | Caucasian | MAFLD  |
| PRJEB28350     | ERR2753706 | 63  | Female | 31.0735 | USA     | Caucasian | Health |
| PRJEB28350     | ERR2753707 | 59  | Female | 28.4878 | USA     | Caucasian | MAFLD  |
| PRJEB28350     | ERR2753708 | 59  | Female | 37.2945 | USA     | Caucasian | MAFLD  |
| PRJEB28350     | ERR2753709 | 66  | Female | 29.8328 | USA     | Caucasian | MAFLD  |
| PRJEB28350     | ERR2753710 | 61  | Female | 37.5828 | USA     | Caucasian | MAFLD  |
| PRJEB28350     | ERR2753711 | 61  | Female | 33.011  | USA     | Caucasian | MAFLD  |
| PRJEB28350     | ERR2753712 | 73  | Female | 37.6636 | USA     | Caucasian | MAFLD  |
| PRJEB28350     | ERR2753713 | 71  | Male   | 39.3951 | USA     | Caucasian | MAFLD  |
| PRJEB28350     | ERR2753714 | 64  | Female | 49.8215 | USA     | Caucasian | MAFLD  |
| PRJEB28350     | ERR2753715 | 79  | Female | 22.9767 | USA     | Caucasian | MAFLD  |



|            |            |           |             |           |        |
|------------|------------|-----------|-------------|-----------|--------|
| PRJEB28350 | ERR2753716 | 47 Female | 26.9788 USA | Caucasian | Health |
| PRJEB28350 | ERR2753717 | 72 Female | 23.8684 USA | Caucasian | MAFLD  |
| PRJEB28350 | ERR2753718 | 44 Female | 23.7007 USA | Caucasian | Health |
| PRJEB28350 | ERR2753719 | 68 Male   | 38.8559 USA | Caucasian | MAFLD  |
| PRJEB28350 | ERR2753720 | 29 Male   | 27.8531 USA | Caucasian | Health |
| PRJEB28350 | ERR2753721 | 72 Female | 71.2938 USA | Caucasian | MAFLD  |
| PRJEB28350 | ERR2753722 | 44 Female | 40.1163 USA | Caucasian | MAFLD  |
| PRJEB28350 | ERR2753723 | 41 Female | 38.4183 USA | Caucasian | MAFLD  |
| PRJEB28350 | ERR2753724 | 58 Female | 45.4668 USA | Caucasian | MAFLD  |
| PRJEB28350 | ERR2753725 | 27 Female | 33.9427 USA | Caucasian | Health |
| PRJEB28350 | ERR2753726 | 79 Female | 28.1221 USA | Caucasian | MAFLD  |
| PRJEB28350 | ERR2753727 | 60 Female | 30.2545 USA | Caucasian | Health |
| PRJEB28350 | ERR2753728 | 49 Female | 27.9904 USA | Caucasian | MAFLD  |
| PRJEB28350 | ERR2753729 | 56 Female | 41.8733 USA | Caucasian | MAFLD  |
| PRJEB28350 | ERR2753730 | 69 Female | 25.0942 USA | Caucasian | MAFLD  |
| PRJEB28350 | ERR2753731 | 30 Female | 36.2053 USA | Caucasian | MAFLD  |
| PRJEB28350 | ERR2753732 | 73 Female | 28.7 USA    | Caucasian | MAFLD  |
| PRJEB28350 | ERR2753733 | 71 Female | 39.5 USA    | Caucasian | MAFLD  |
| PRJEB28350 | ERR2753734 | 18 Female | 20.5 USA    | Caucasian | Health |
| PRJEB28350 | ERR2753735 | 18 Female | 21.2 USA    | Caucasian | Health |
| PRJEB28350 | ERR2753736 | 25 Male   | 17.8 USA    | Caucasian | Health |
| PRJEB28350 | ERR2753737 | 25 Male   | 18.8 USA    | Caucasian | Health |
| PRJEB28350 | ERR2753738 | 22 Female | 19.8 USA    | Caucasian | Health |
| PRJEB28350 | ERR2753739 | 22 Female | 21.3 USA    | Caucasian | Health |
| PRJEB28350 | ERR2753740 | 58 Male   | 32.6 USA    | Caucasian | MAFLD  |
| PRJEB28350 | ERR2753741 | 58 Male   | 32.2 USA    | Caucasian | MAFLD  |
| PRJEB28350 | ERR2753742 | 64 Female | 23.4 USA    | Caucasian | Health |
| PRJEB28350 | ERR2753743 | 64 Female | 21.9 USA    | Caucasian | Health |
| PRJEB28350 | ERR2753744 | 66 Female | 22.2 USA    | Caucasian | Health |
| PRJEB28350 | ERR2753745 | 66 Female | 23.4 USA    | Caucasian | Health |
| PRJEB28350 | ERR2753746 | 21 Female | 20.5 USA    | Caucasian | Health |
| PRJEB28350 | ERR2753747 | 71 Female | 24.6 USA    | Caucasian | Health |
| PRJEB28350 | ERR2753748 | 71 Female | 23.9 USA    | Caucasian | Health |
| PRJEB28350 | ERR2753749 | 82 Female | 22.1 USA    | Caucasian | MAFLD  |
| PRJEB28350 | ERR2753751 | 51 Female | 29.6 USA    | Caucasian | Health |
| PRJEB28350 | ERR2753752 | 84 Female | 23.6 USA    | Caucasian | Health |
| PRJEB28350 | ERR2753753 | 84 Female | 25.3 USA    | Caucasian | Health |
| PRJEB28350 | ERR2753754 | 51 Female | 25.8 USA    | Caucasian | Health |
| PRJEB28350 | ERR2753755 | 19 Female | 29.5 USA    | Caucasian | Health |
| PRJEB28350 | ERR2753756 | 61 Female | 29.1 USA    | Caucasian | MAFLD  |
| PRJEB28350 | ERR2753757 | 61 Female | 28.8 USA    | Caucasian | MAFLD  |
| PRJEB28350 | ERR2753758 | 20 Male   | 25 USA      | Caucasian | Health |
| PRJEB28350 | ERR2753759 | 21 Male   | 29 USA      | Caucasian | Health |
| PRJEB28350 | ERR2753760 | 72 Female | 24.6 USA    | Caucasian | Health |
| PRJEB28350 | ERR2753761 | 72 Female | 22.7 USA    | Caucasian | Health |
| PRJEB28350 | ERR2753762 | 56 Female | 20.4 USA    | Caucasian | Health |

|            |            |           |          |           |        |
|------------|------------|-----------|----------|-----------|--------|
| PRJEB28350 | ERR2753763 | 23 Male   | 26.3 USA | Caucasian | Health |
| PRJEB28350 | ERR2753764 | 55 Female | 30 USA   | Caucasian | Health |
| PRJEB28350 | ERR2753765 | 19 Male   | 17.9 USA | Caucasian | Health |
| PRJEB28350 | ERR2753766 | 52 Male   | 32.6 USA | Caucasian | MAFLD  |
| PRJEB28350 | ERR2753767 | 51 Male   | 31.8 USA | Caucasian | MAFLD  |
| PRJEB28350 | ERR2753768 | 32 Female | 43.9 USA | Caucasian | Health |
| PRJEB28350 | ERR2753769 | 32 Female | 36.8 USA | Caucasian | MAFLD  |
| PRJEB28350 | ERR2753770 | 25 Female | 22.2 USA | Caucasian | Health |
| PRJEB28350 | ERR2753771 | 29 Female | 21.2 USA | Caucasian | Health |
| PRJEB28350 | ERR2753772 | 21 Female | 24.1 USA | Caucasian | Health |
| PRJEB28350 | ERR2753773 | 22 Female | 19.4 USA | Caucasian | Health |
| PRJEB28350 | ERR2753774 | 51 Female | 27.7 USA | Caucasian | Health |
| PRJEB28350 | ERR2753775 | 18 Female | 23.3 USA | Caucasian | Health |
| PRJEB28350 | ERR2753776 | 23 Female | 21.8 USA | Caucasian | Health |
| PRJEB28350 | ERR2753777 | 21 Male   | 19.2 USA | Caucasian | Health |
| PRJEB28350 | ERR2753778 | 60 Female | 26.6 USA | Caucasian | Health |
| PRJEB28350 | ERR2753779 | 60 Female | 24.9 USA | Caucasian | Health |
| PRJEB28350 | ERR2753780 | 64 Female | 22.6 USA | Caucasian | Health |
| PRJEB28350 | ERR2753781 | 64 Female | 21.9 USA | Caucasian | MAFLD  |
| PRJEB28350 | ERR2753783 | 21 Male   | 23.5 USA | Caucasian | Health |
| PRJEB28350 | ERR2753784 | 56 Female | 25.4 USA | Caucasian | Health |
| PRJEB28350 | ERR2753785 | 22 Male   | 29.8 USA | Caucasian | Health |
| PRJEB28350 | ERR2753786 | 49 Male   | 36.9 USA | Caucasian | MAFLD  |
| PRJEB28350 | ERR2753787 | 49 Male   | 36 USA   | Caucasian | MAFLD  |
| PRJEB28350 | ERR2753788 | 64 Female | 27.3 USA | Caucasian | Health |
| PRJEB28350 | ERR2753789 | 64 Female | 22.8 USA | Caucasian | Health |
| PRJEB28350 | ERR2753790 | 22 Male   | 30.3 USA | Caucasian | Health |
| PRJEB28350 | ERR2753791 | 22 Male   | 28.8 USA | Caucasian | Health |
| PRJEB28350 | ERR2753792 | 49 Female | 25.4 USA | Caucasian | MAFLD  |
| PRJEB28350 | ERR2753793 | 49 Female | 26 USA   | Caucasian | MAFLD  |
| PRJEB28350 | ERR2753794 | 63 Female | 25.4 USA | Caucasian | Health |
| PRJEB28350 | ERR2753795 | 22 Female | 23.7 USA | Caucasian | Health |
| PRJEB28350 | ERR2753796 | 30 Male   | 21.4 USA | Caucasian | Health |
| PRJEB28350 | ERR2753797 | 30 Male   | 23.3 USA | Caucasian | Health |
| PRJEB28350 | ERR2753798 | 52 Female | 21.9 USA | Caucasian | Health |
| PRJEB28350 | ERR2753799 | 52 Female | 24.1 USA | Caucasian | Health |
| PRJEB28350 | ERR2753800 | 61 Male   | 44.4 USA | Caucasian | Health |
| PRJEB28350 | ERR2753801 | 61 Male   | 36.4 USA | Caucasian | Health |
| PRJEB28350 | ERR2753802 | 28 Male   | 24.8 USA | Caucasian | Health |
| PRJEB28350 | ERR2753803 | 28 Male   | 30.7 USA | Caucasian | Health |
| PRJEB28350 | ERR2753804 | 55 Female | 28.8 USA | Caucasian | Health |
| PRJEB28350 | ERR2753805 | 27 Female | 27.3 USA | Caucasian | Health |
| PRJEB28350 | ERR2753806 | 61 Male   | 33.1 USA | Caucasian | MAFLD  |
| PRJEB28350 | ERR2753807 | 61 Male   | 32.1 USA | Caucasian | MAFLD  |
| PRJEB28350 | ERR2753808 | 74 Female | 29.5 USA | Caucasian | MAFLD  |
| PRJEB28350 | ERR2753809 | 74 Female | 23.5 USA | Caucasian | Health |

|            |            |           |      |     |           |        |
|------------|------------|-----------|------|-----|-----------|--------|
| PRJEB28350 | ERR2753810 | 62 Female | 38.7 | USA | Caucasian | MAFLD  |
| PRJEB28350 | ERR2753811 | 41 Male   | 41.8 | USA | Caucasian | Health |
| PRJEB28350 | ERR2753812 | 64 Male   | 25   | USA | Caucasian | Health |
| PRJEB28350 | ERR2753813 | 27 Female | 22.9 | USA | Caucasian | Health |
| PRJEB28350 | ERR2753814 | 27 Female | 20.9 | USA | Caucasian | Health |
| PRJEB28350 | ERR2753815 | 33 Female | 21.5 | USA | Caucasian | Health |
| PRJEB28350 | ERR2753816 | 33 Female | 23.7 | USA | Caucasian | Health |
| PRJEB28350 | ERR2753817 | 24 Male   | 31.4 | USA | Caucasian | MAFLD  |
| PRJEB28350 | ERR2753818 | 24 Male   | 29.8 | USA | Caucasian | Health |
| PRJEB28350 | ERR2753819 | 78 Male   | 36.1 | USA | Caucasian | MAFLD  |
| PRJEB28350 | ERR2753820 | 78 Male   | 34   | USA | Caucasian | MAFLD  |
| PRJEB28350 | ERR2753822 | 47 Female | 42.6 | USA | Caucasian | MAFLD  |
| PRJEB28350 | ERR2753823 | 54 Male   | 26.4 | USA | Caucasian | Health |
| PRJEB28350 | ERR2753824 | 54 Male   | 27.9 | USA | Caucasian | Health |
| PRJEB28350 | ERR2753825 | 55 Female | 34.4 | USA | Caucasian | Health |
| PRJEB28350 | ERR2753826 | 55 Female | 31.2 | USA | Caucasian | Health |
| PRJEB28350 | ERR2753827 | 49 Female | 24   | USA | Caucasian | MAFLD  |
| PRJEB28350 | ERR2753828 | 49 Female | 20.8 | USA | Caucasian | Health |
| PRJEB28350 | ERR2753829 | 25 Female | 20.2 | USA | Caucasian | Health |
| PRJEB28350 | ERR2753830 | 71 Female | 25.2 | USA | Caucasian | Health |
| PRJEB28350 | ERR2753831 | 71 Female | 27.4 | USA | Caucasian | Health |
| PRJEB28350 | ERR2753832 | 56 Female | 38.7 | USA | Caucasian | MAFLD  |
| PRJEB28350 | ERR2753833 | 75 Female | 21.1 | USA | Caucasian | Health |
| PRJEB28350 | ERR2753834 | 19 Female | 28.7 | USA | Caucasian | Health |
| PRJEB28350 | ERR2753835 | 19 Male   | 37   | USA | Caucasian | Health |
| PRJEB28350 | ERR2753836 | 51 Male   | 29.8 | USA | Caucasian | MAFLD  |
| PRJEB28350 | ERR2753838 | 55 Female | 33.1 | USA | Caucasian | Health |
| PRJEB28350 | ERR2753839 | 58 Male   | 25.2 | USA | Caucasian | Health |
| PRJEB28350 | ERR2753840 | 32 Male   | 21.6 | USA | Caucasian | MAFLD  |
| PRJEB28350 | ERR2753841 | 53 Female | 23.1 | USA | Caucasian | Health |
| PRJEB28350 | ERR2753842 | 56 Female | 22   | USA | Caucasian | Health |
| PRJEB28350 | ERR2753843 | 49 Female | 38.4 | USA | Caucasian | MAFLD  |
| PRJEB28350 | ERR2753844 | 79 Female | 26.4 | USA | Caucasian | MAFLD  |
| PRJEB28350 | ERR2753845 | 65 Female | 20.6 | USA | Caucasian | Health |
| PRJEB28350 | ERR2753846 | 65 Female | 19.6 | USA | Caucasian | Health |
| PRJEB28350 | ERR2753847 | 65 Female | 24.7 | USA | Caucasian | Health |
| PRJEB28350 | ERR2753848 | 60 Female |      | USA | Caucasian | Health |
| PRJEB28350 | ERR2753849 | 60 Female | 27   | USA | Caucasian | MAFLD  |
| PRJEB28350 | ERR2753850 | 71 Female | 34.8 | USA | Caucasian | Health |
| PRJEB28350 | ERR2753851 | 39 Female | 23.5 | USA | Caucasian | Health |
| PRJEB28350 | ERR2753852 | 27 Female | 28.7 | USA | Caucasian | Health |
| PRJEB28350 | ERR2753853 | 27 Female | 29.3 | USA | Caucasian | Health |
| PRJEB28350 | ERR2753854 | 43 Female | 39.4 | USA | Caucasian | Health |
| PRJEB28350 | ERR2753856 | 29 Female | 20.6 | USA | Caucasian | Health |
| PRJEB28350 | ERR2753857 | 67 Female | 20.3 | USA | Caucasian | Health |
| PRJEB28350 | ERR2753858 | 67 Female | 22.1 | USA | Caucasian | Health |

|            |            |           |      |       |           |        |
|------------|------------|-----------|------|-------|-----------|--------|
| PRJEB28350 | ERR2753859 | 63 Female | 23.6 | USA   | Caucasian | Health |
| PRJEB28350 | ERR2753860 | 63 Female | 24.9 | USA   | Caucasian | Health |
| PRJEB28350 | ERR2753861 | 64 Female | 25.9 | USA   | Caucasian | Health |
| PRJEB28350 | ERR2753862 | 64 Female | 32.3 | USA   | Caucasian | Health |
| PRJEB28350 | ERR2753863 | 62 Male   | 33.7 | USA   | Caucasian | Health |
| PRJEB28350 | ERR2753864 | 62 Female | 27.8 | USA   | Caucasian | Health |
| PRJEB28350 | ERR2753865 | 21 Male   | 20.8 | USA   | Caucasian | Health |
| PRJEB28350 | ERR2753866 | 58 Male   | 57.6 | USA   | Caucasian | Health |
| PRJEB28350 | ERR2753867 | 65 Female | 32.5 | USA   | Caucasian | Health |
| PRJEB28350 | ERR2753868 | 65 Female | 30.1 | USA   | Caucasian | Health |
| PRJEB28350 | ERR2753869 | 21 Male   | 24.4 | USA   | Caucasian | Health |
| PRJEB28350 | ERR2753870 | 21 Male   | 21.9 | USA   | Caucasian | Health |
| PRJEB28350 | ERR2753871 | 56 Male   | 27.1 | USA   | Caucasian | Health |
| PRJEB27662 | ERR4135132 |           |      | Korea | Asian     | Health |
| PRJEB27662 | ERR4135133 |           |      | Korea | Asian     | Health |
| PRJEB27662 | ERR4135134 |           |      | Korea | Asian     | Health |
| PRJEB27662 | ERR4135135 |           |      | Korea | Asian     | Health |
| PRJEB27662 | ERR4135136 |           |      | Korea | Asian     | Health |
| PRJEB27662 | ERR4135137 |           |      | Korea | Asian     | Health |
| PRJEB27662 | ERR4135138 |           |      | Korea | Asian     | Health |
| PRJEB27662 | ERR4135139 |           |      | Korea | Asian     | Health |
| PRJEB27662 | ERR4135140 |           |      | Korea | Asian     | Health |
| PRJEB27662 | ERR4135141 |           |      | Korea | Asian     | Health |
| PRJEB27662 | ERR4135142 |           |      | Korea | Asian     | Health |
| PRJEB27662 | ERR4135143 |           |      | Korea | Asian     | Health |
| PRJEB27662 | ERR4135144 |           |      | Korea | Asian     | Health |
| PRJEB27662 | ERR4135145 |           |      | Korea | Asian     | Health |
| PRJEB27662 | ERR4135146 |           |      | Korea | Asian     | Health |
| PRJEB27662 | ERR4135147 |           |      | Korea | Asian     | Health |
| PRJEB27662 | ERR4135148 |           |      | Korea | Asian     | Health |
| PRJEB27662 | ERR4135149 |           |      | Korea | Asian     | Health |
| PRJEB27662 | ERR4135150 |           |      | Korea | Asian     | Health |
| PRJEB27662 | ERR4135151 |           |      | Korea | Asian     | Health |
| PRJEB27662 | ERR4135152 |           |      | Korea | Asian     | Health |
| PRJEB27662 | ERR4135153 |           |      | Korea | Asian     | Health |
| PRJEB27662 | ERR4135154 |           |      | Korea | Asian     | Health |
| PRJEB27662 | ERR4135155 |           |      | Korea | Asian     | Health |
| PRJEB27662 | ERR4135156 |           |      | Korea | Asian     | Health |
| PRJEB27662 | ERR4135157 |           |      | Korea | Asian     | Health |
| PRJEB27662 | ERR4135158 |           |      | Korea | Asian     | Health |
| PRJEB27662 | ERR4135159 |           |      | Korea | Asian     | Health |
| PRJEB27662 | ERR4135160 |           |      | Korea | Asian     | Health |
| PRJEB27662 | ERR4135161 |           |      | Korea | Asian     | Health |
| PRJEB27662 | ERR4135162 |           |      | Korea | Asian     | Health |
| PRJEB27662 | ERR4135163 |           |      | Korea | Asian     | Health |
| PRJEB27662 | ERR4135164 |           |      | Korea | Asian     | Health |

|            |            |       |       |        |
|------------|------------|-------|-------|--------|
| PRJEB27662 | ERR4135165 | Korea | Asian | Health |
| PRJEB27662 | ERR4135166 | Korea | Asian | Health |
| PRJEB27662 | ERR4135167 | Korea | Asian | Health |
| PRJEB27662 | ERR4135168 | Korea | Asian | Health |
| PRJEB27662 | ERR4135169 | Korea | Asian | Health |
| PRJEB27662 | ERR4135170 | Korea | Asian | MAFLD  |
| PRJEB27662 | ERR4135171 | Korea | Asian | MAFLD  |
| PRJEB27662 | ERR4135172 | Korea | Asian | MAFLD  |
| PRJEB27662 | ERR4135173 | Korea | Asian | MAFLD  |
| PRJEB27662 | ERR4135174 | Korea | Asian | MAFLD  |
| PRJEB27662 | ERR4135175 | Korea | Asian | MAFLD  |
| PRJEB27662 | ERR4135176 | Korea | Asian | MAFLD  |
| PRJEB27662 | ERR4135177 | Korea | Asian | MAFLD  |
| PRJEB27662 | ERR4135178 | Korea | Asian | MAFLD  |
| PRJEB27662 | ERR4135179 | Korea | Asian | MAFLD  |
| PRJEB27662 | ERR4135180 | Korea | Asian | MAFLD  |
| PRJEB27662 | ERR4135181 | Korea | Asian | MAFLD  |
| PRJEB27662 | ERR4135182 | Korea | Asian | MAFLD  |
| PRJEB27662 | ERR4135183 | Korea | Asian | MAFLD  |
| PRJEB27662 | ERR4135184 | Korea | Asian | MAFLD  |
| PRJEB27662 | ERR4135185 | Korea | Asian | MAFLD  |
| PRJEB27662 | ERR4135186 | Korea | Asian | MAFLD  |
| PRJEB27662 | ERR4135187 | Korea | Asian | MAFLD  |
| PRJEB27662 | ERR4135188 | Korea | Asian | MAFLD  |
| PRJEB27662 | ERR4135189 | Korea | Asian | MAFLD  |
| PRJEB27662 | ERR4135190 | Korea | Asian | MAFLD  |
| PRJEB27662 | ERR4135191 | Korea | Asian | MAFLD  |
| PRJEB27662 | ERR4135192 | Korea | Asian | MAFLD  |
| PRJEB27662 | ERR4135193 | Korea | Asian | MAFLD  |
| PRJEB27662 | ERR4135194 | Korea | Asian | MAFLD  |
| PRJEB27662 | ERR4135195 | Korea | Asian | MAFLD  |
| PRJEB27662 | ERR4135196 | Korea | Asian | MAFLD  |
| PRJEB27662 | ERR4135197 | Korea | Asian | MAFLD  |
| PRJEB27662 | ERR4135198 | Korea | Asian | MAFLD  |
| PRJEB27662 | ERR4135199 | Korea | Asian | MAFLD  |
| PRJEB27662 | ERR4135200 | Korea | Asian | MAFLD  |
| PRJEB27662 | ERR4135201 | Korea | Asian | MAFLD  |
| PRJEB27662 | ERR4135202 | Korea | Asian | MAFLD  |
| PRJEB27662 | ERR4135203 | Korea | Asian | MAFLD  |
| PRJEB27662 | ERR4135204 | Korea | Asian | MAFLD  |
| PRJEB27662 | ERR4135205 | Korea | Asian | MAFLD  |
| PRJEB27662 | ERR4135206 | Korea | Asian | MAFLD  |
| PRJEB27662 | ERR4135207 | Korea | Asian | MAFLD  |
| PRJEB27662 | ERR4135208 | Korea | Asian | MAFLD  |
| PRJEB27662 | ERR4135209 | Korea | Asian | MAFLD  |
| PRJEB27662 | ERR4135210 | Korea | Asian | MAFLD  |

|            |            |       |       |       |
|------------|------------|-------|-------|-------|
| PRJEB27662 | ERR4135211 | Korea | Asian | MAFLD |
| PRJEB27662 | ERR4135212 | Korea | Asian | MAFLD |
| PRJEB27662 | ERR4135213 | Korea | Asian | MAFLD |
| PRJEB27662 | ERR4135214 | Korea | Asian | MAFLD |
| PRJEB27662 | ERR4135215 | Korea | Asian | MAFLD |
| PRJEB27662 | ERR4135216 | Korea | Asian | MAFLD |
| PRJEB27662 | ERR4135217 | Korea | Asian | MAFLD |
| PRJEB27662 | ERR4135218 | Korea | Asian | MAFLD |
| PRJEB27662 | ERR4135219 | Korea | Asian | MAFLD |
| PRJEB27662 | ERR4135220 | Korea | Asian | MAFLD |
| PRJEB27662 | ERR4135221 | Korea | Asian | MAFLD |
| PRJEB27662 | ERR4135222 | Korea | Asian | MAFLD |
| PRJEB27662 | ERR4135223 | Korea | Asian | MAFLD |
| PRJEB27662 | ERR4135224 | Korea | Asian | MAFLD |
| PRJEB27662 | ERR4135225 | Korea | Asian | MAFLD |
| PRJEB27662 | ERR4135226 | Korea | Asian | MAFLD |
| PRJEB27662 | ERR4135227 | Korea | Asian | MAFLD |
| PRJEB27662 | ERR4135228 | Korea | Asian | MAFLD |
| PRJEB27662 | ERR4135229 | Korea | Asian | MAFLD |
| PRJEB27662 | ERR4135230 | Korea | Asian | MAFLD |
| PRJEB27662 | ERR4135231 | Korea | Asian | MAFLD |
| PRJEB27662 | ERR4135232 | Korea | Asian | MAFLD |
| PRJEB27662 | ERR4135233 | Korea | Asian | MAFLD |
| PRJEB27662 | ERR4135234 | Korea | Asian | MAFLD |
| PRJEB27662 | ERR4135235 | Korea | Asian | MAFLD |
| PRJEB27662 | ERR4135236 | Korea | Asian | MAFLD |
| PRJEB27662 | ERR4135237 | Korea | Asian | MAFLD |
| PRJEB27662 | ERR4135238 | Korea | Asian | MAFLD |
| PRJEB27662 | ERR4135239 | Korea | Asian | MAFLD |
| PRJEB27662 | ERR4135240 | Korea | Asian | MAFLD |
| PRJEB27662 | ERR4135241 | Korea | Asian | MAFLD |
| PRJEB27662 | ERR4135242 | Korea | Asian | MAFLD |
| PRJEB27662 | ERR4135243 | Korea | Asian | MAFLD |
| PRJEB27662 | ERR4135244 | Korea | Asian | MAFLD |
| PRJEB27662 | ERR4135245 | Korea | Asian | MAFLD |
| PRJEB27662 | ERR4135246 | Korea | Asian | MAFLD |
| PRJEB27662 | ERR4135247 | Korea | Asian | MAFLD |
| PRJEB27662 | ERR4135248 | Korea | Asian | MAFLD |
| PRJEB27662 | ERR4135249 | Korea | Asian | MAFLD |
| PRJEB27662 | ERR4135250 | Korea | Asian | MAFLD |
| PRJEB27662 | ERR4135251 | Korea | Asian | MAFLD |
| PRJEB27662 | ERR4135252 | Korea | Asian | MAFLD |
| PRJEB27662 | ERR4135253 | Korea | Asian | MAFLD |
| PRJEB27662 | ERR4135254 | Korea | Asian | MAFLD |
| PRJEB27662 | ERR4135255 | Korea | Asian | MAFLD |
| PRJEB27662 | ERR4135256 | Korea | Asian | MAFLD |

|            |            |       |       |       |
|------------|------------|-------|-------|-------|
| PRJEB27662 | ERR4135257 | Korea | Asian | MAFLD |
| PRJEB27662 | ERR4135258 | Korea | Asian | MAFLD |
| PRJEB27662 | ERR4135259 | Korea | Asian | MAFLD |
| PRJEB27662 | ERR4135260 | Korea | Asian | MAFLD |
| PRJEB27662 | ERR4135261 | Korea | Asian | MAFLD |
| PRJEB27662 | ERR4135262 | Korea | Asian | MAFLD |
| PRJEB27662 | ERR4135263 | Korea | Asian | MAFLD |
| PRJEB27662 | ERR4135264 | Korea | Asian | MAFLD |
| PRJEB27662 | ERR4135265 | Korea | Asian | MAFLD |
| PRJEB27662 | ERR4135266 | Korea | Asian | MAFLD |
| PRJEB27662 | ERR4135267 | Korea | Asian | MAFLD |
| PRJEB27662 | ERR4135268 | Korea | Asian | MAFLD |
| PRJEB27662 | ERR4135269 | Korea | Asian | MAFLD |
| PRJEB27662 | ERR4135270 | Korea | Asian | MAFLD |
| PRJEB27662 | ERR4135271 | Korea | Asian | MAFLD |
| PRJEB27662 | ERR4135272 | Korea | Asian | MAFLD |
| PRJEB27662 | ERR4135273 | Korea | Asian | MAFLD |
| PRJEB27662 | ERR4135274 | Korea | Asian | MAFLD |
| PRJEB27662 | ERR4135275 | Korea | Asian | MAFLD |
| PRJEB27662 | ERR4135276 | Korea | Asian | MAFLD |
| PRJEB27662 | ERR4135277 | Korea | Asian | MAFLD |
| PRJEB27662 | ERR4135278 | Korea | Asian | MAFLD |
| PRJEB27662 | ERR4135279 | Korea | Asian | MAFLD |
| PRJEB27662 | ERR4135280 | Korea | Asian | MAFLD |
| PRJEB27662 | ERR4135281 | Korea | Asian | MAFLD |
| PRJEB27662 | ERR4135282 | Korea | Asian | MAFLD |
| PRJEB27662 | ERR4135283 | Korea | Asian | MAFLD |
| PRJEB27662 | ERR4135284 | Korea | Asian | MAFLD |
| PRJEB27662 | ERR4135285 | Korea | Asian | MAFLD |
| PRJEB27662 | ERR4135286 | Korea | Asian | MAFLD |
| PRJEB27662 | ERR4135287 | Korea | Asian | MAFLD |
| PRJEB27662 | ERR4135288 | Korea | Asian | MAFLD |
| PRJEB27662 | ERR4135289 | Korea | Asian | MAFLD |
| PRJEB27662 | ERR4135290 | Korea | Asian | MAFLD |
| PRJEB27662 | ERR4135291 | Korea | Asian | MAFLD |
| PRJEB27662 | ERR4135292 | Korea | Asian | MAFLD |
| PRJEB27662 | ERR4135293 | Korea | Asian | MAFLD |
| PRJEB27662 | ERR4135294 | Korea | Asian | MAFLD |
| PRJEB27662 | ERR4135295 | Korea | Asian | MAFLD |
| PRJEB27662 | ERR4135296 | Korea | Asian | MAFLD |
| PRJEB27662 | ERR4135297 | Korea | Asian | MAFLD |
| PRJEB27662 | ERR4135298 | Korea | Asian | MAFLD |
| PRJEB27662 | ERR4135299 | Korea | Asian | MAFLD |
| PRJEB27662 | ERR4135300 | Korea | Asian | MAFLD |
| PRJEB27662 | ERR4135301 | Korea | Asian | MAFLD |
| PRJEB27662 | ERR4135302 | Korea | Asian | MAFLD |

|            |            |       |       |       |
|------------|------------|-------|-------|-------|
| PRJEB27662 | ERR4135303 | Korea | Asian | MAFLD |
| PRJEB27662 | ERR4135304 | Korea | Asian | MAFLD |
| PRJEB27662 | ERR4135305 | Korea | Asian | MAFLD |
| PRJEB27662 | ERR4135306 | Korea | Asian | MAFLD |
| PRJEB27662 | ERR4135307 | Korea | Asian | MAFLD |
| PRJEB27662 | ERR4135308 | Korea | Asian | MAFLD |
| PRJEB27662 | ERR4135309 | Korea | Asian | MAFLD |
| PRJEB27662 | ERR4135310 | Korea | Asian | MAFLD |
| PRJEB27662 | ERR4135311 | Korea | Asian | MAFLD |
| PRJEB27662 | ERR4135312 | Korea | Asian | MAFLD |
| PRJEB27662 | ERR4135313 | Korea | Asian | MAFLD |
| PRJEB27662 | ERR4135314 | Korea | Asian | MAFLD |
| PRJEB27662 | ERR4135315 | Korea | Asian | MAFLD |
| PRJEB27662 | ERR4135316 | Korea | Asian | MAFLD |
| PRJEB27662 | ERR4135317 | Korea | Asian | MAFLD |
| PRJEB27662 | ERR4135318 | Korea | Asian | MAFLD |
| PRJEB27662 | ERR4135319 | Korea | Asian | MAFLD |
| PRJEB27662 | ERR4135320 | Korea | Asian | MAFLD |
| PRJEB27662 | ERR4135321 | Korea | Asian | MAFLD |
| PRJEB27662 | ERR4135322 | Korea | Asian | MAFLD |
| PRJEB27662 | ERR4135323 | Korea | Asian | MAFLD |
| PRJEB27662 | ERR4135324 | Korea | Asian | MAFLD |
| PRJEB27662 | ERR4135325 | Korea | Asian | MAFLD |
| PRJEB27662 | ERR4135326 | Korea | Asian | MAFLD |
| PRJEB27662 | ERR4135327 | Korea | Asian | MAFLD |
| PRJEB27662 | ERR4135328 | Korea | Asian | MAFLD |
| PRJEB27662 | ERR4135329 | Korea | Asian | MAFLD |
| PRJEB27662 | ERR4135330 | Korea | Asian | MAFLD |
| PRJEB27662 | ERR4135331 | Korea | Asian | MAFLD |
| PRJEB27662 | ERR4135332 | Korea | Asian | MAFLD |
| PRJEB27662 | ERR4135333 | Korea | Asian | MAFLD |
| PRJEB27662 | ERR4135334 | Korea | Asian | MAFLD |
| PRJEB27662 | ERR4135335 | Korea | Asian | MAFLD |
| PRJEB27662 | ERR4135336 | Korea | Asian | MAFLD |
| PRJEB27662 | ERR4135337 | Korea | Asian | MAFLD |
| PRJEB27662 | ERR4135338 | Korea | Asian | MAFLD |
| PRJEB27662 | ERR4135339 | Korea | Asian | MAFLD |
| PRJEB27662 | ERR4135340 | Korea | Asian | MAFLD |
| PRJEB27662 | ERR4135341 | Korea | Asian | MAFLD |
| PRJEB27662 | ERR4135342 | Korea | Asian | MAFLD |
| PRJEB27662 | ERR4135343 | Korea | Asian | MAFLD |
| PRJEB27662 | ERR4135344 | Korea | Asian | MAFLD |
| PRJEB27662 | ERR4135345 | Korea | Asian | MAFLD |
| PRJEB27662 | ERR4135346 | Korea | Asian | MAFLD |
| PRJEB27662 | ERR4135347 | Korea | Asian | MAFLD |
| PRJEB27662 | ERR4135348 | Korea | Asian | MAFLD |



|            |            |       |       |       |
|------------|------------|-------|-------|-------|
| PRJEB27662 | ERR4135349 | Korea | Asian | MAFLD |
| PRJEB27662 | ERR4135350 | Korea | Asian | MAFLD |
| PRJEB27662 | ERR4135351 | Korea | Asian | MAFLD |
| PRJEB27662 | ERR4135352 | Korea | Asian | MAFLD |
| PRJEB27662 | ERR4135353 | Korea | Asian | MAFLD |
| PRJEB27662 | ERR4135354 | Korea | Asian | MAFLD |
| PRJEB27662 | ERR4135355 | Korea | Asian | MAFLD |
| PRJEB27662 | ERR4135356 | Korea | Asian | MAFLD |
| PRJEB27662 | ERR4135357 | Korea | Asian | MAFLD |
| PRJEB27662 | ERR4135358 | Korea | Asian | MAFLD |
| PRJEB27662 | ERR4135359 | Korea | Asian | MAFLD |
| PRJEB27662 | ERR4135360 | Korea | Asian | MAFLD |
| PRJEB27662 | ERR4135361 | Korea | Asian | MAFLD |
| PRJEB27662 | ERR4135362 | Korea | Asian | MAFLD |
| PRJEB27662 | ERR4135363 | Korea | Asian | MAFLD |
| PRJEB27662 | ERR4135364 | Korea | Asian | MAFLD |
| PRJEB27662 | ERR4135365 | Korea | Asian | MAFLD |
| PRJEB27662 | ERR4135366 | Korea | Asian | MAFLD |
| PRJEB27662 | ERR4135367 | Korea | Asian | MAFLD |
| PRJEB27662 | ERR4135368 | Korea | Asian | MAFLD |
| PRJEB27662 | ERR4135369 | Korea | Asian | MAFLD |
| PRJEB27662 | ERR4135370 | Korea | Asian | MAFLD |
| PRJEB27662 | ERR4135371 | Korea | Asian | MAFLD |
| PRJEB27662 | ERR4135372 | Korea | Asian | MAFLD |
| PRJEB27662 | ERR4135373 | Korea | Asian | MAFLD |
| PRJEB27662 | ERR4135374 | Korea | Asian | MAFLD |
| PRJEB27662 | ERR4135375 | Korea | Asian | MAFLD |
| PRJEB27662 | ERR4135376 | Korea | Asian | MAFLD |
| PRJEB27662 | ERR4135377 | Korea | Asian | MAFLD |
| PRJEB27662 | ERR4135378 | Korea | Asian | MAFLD |
| PRJEB27662 | ERR4135379 | Korea | Asian | MAFLD |
| PRJEB27662 | ERR4135380 | Korea | Asian | MAFLD |
| PRJEB27662 | ERR4135381 | Korea | Asian | MAFLD |
| PRJEB27662 | ERR4135382 | Korea | Asian | MAFLD |
| PRJEB27662 | ERR4135383 | Korea | Asian | MAFLD |
| PRJEB27662 | ERR4135384 | Korea | Asian | MAFLD |
| PRJEB27662 | ERR4135385 | Korea | Asian | MAFLD |
| PRJEB27662 | ERR4135386 | Korea | Asian | MAFLD |
| PRJEB27662 | ERR4135387 | Korea | Asian | MAFLD |
| PRJEB27662 | ERR4135388 | Korea | Asian | MAFLD |
| PRJEB27662 | ERR4135389 | Korea | Asian | MAFLD |
| PRJEB27662 | ERR4135390 | Korea | Asian | MAFLD |
| PRJEB27662 | ERR4135391 | Korea | Asian | MAFLD |
| PRJEB27662 | ERR4135392 | Korea | Asian | MAFLD |
| PRJEB27662 | ERR4135393 | Korea | Asian | MAFLD |
| PRJEB27662 | ERR4135394 | Korea | Asian | MAFLD |

|            |            |       |           |       |
|------------|------------|-------|-----------|-------|
| PRJEB27662 | ERR4135395 | Korea | Asian     | MAFLD |
| PRJEB27662 | ERR4135396 | Korea | Asian     | MAFLD |
| PRJEB27662 | ERR4135397 | Korea | Asian     | MAFLD |
| PRJEB27662 | ERR4135398 | Korea | Asian     | MAFLD |
| PRJEB27662 | ERR4135399 | Korea | Asian     | MAFLD |
| PRJEB27662 | ERR4135400 | Korea | Asian     | MAFLD |
| PRJEB27662 | ERR4135401 | Korea | Asian     | MAFLD |
| PRJEB27662 | ERR4135402 | Korea | Asian     | MAFLD |
| PRJEB27662 | ERR4135403 | Korea | Asian     | MAFLD |
| PRJEB27662 | ERR4135404 | Korea | Asian     | MAFLD |
| PRJEB27662 | ERR4135405 | Korea | Asian     | MAFLD |
| PRJEB27662 | ERR4135406 | Korea | Asian     | MAFLD |
| PRJEB27662 | ERR4135407 | Korea | Asian     | MAFLD |
| PRJEB27662 | ERR4135408 | Korea | Asian     | MAFLD |
| PRJEB27662 | ERR4135409 | Korea | Asian     | MAFLD |
| PRJEB27662 | ERR4135410 | Korea | Asian     | MAFLD |
| PRJEB27662 | ERR4135411 | Korea | Asian     | MAFLD |
| PRJEB27662 | ERR4135412 | Korea | Asian     | MAFLD |
| PRJEB27662 | ERR4135413 | Korea | Asian     | MAFLD |
| PRJEB27662 | ERR4135414 | Korea | Asian     | MAFLD |
| PRJEB27662 | ERR4135415 | Korea | Asian     | MAFLD |
| PRJEB27662 | ERR4135416 | Korea | Asian     | MAFLD |
| PRJEB27662 | ERR4135417 | Korea | Asian     | MAFLD |
| PRJEB27662 | ERR4135418 | Korea | Asian     | MAFLD |
| PRJEB27662 | ERR4135419 | Korea | Asian     | MAFLD |
| PRJEB27662 | ERR4135420 | Korea | Asian     | MAFLD |
| PRJEB27662 | ERR4135421 | Korea | Asian     | MAFLD |
| PRJEB27662 | ERR4135422 | Korea | Asian     | MAFLD |
| PRJEB27662 | ERR4135423 | Korea | Asian     | MAFLD |
| PRJEB27662 | ERR4135424 | Korea | Asian     | MAFLD |
| PRJEB27662 | ERR4135425 | Korea | Asian     | MAFLD |
| PRJEB27662 | ERR4135426 | Korea | Asian     | MAFLD |
| PRJEB27662 | ERR4135427 | Korea | Asian     | MAFLD |
| PRJEB27662 | ERR4135428 | Korea | Asian     | MAFLD |
| PRJEB27662 | ERR4135429 | Korea | Asian     | MAFLD |
| PRJEB27662 | ERR4135430 | Korea | Asian     | MAFLD |
| PRJEB27662 | ERR4135431 | Korea | Asian     | MAFLD |
| PRJEB27662 | ERR4135432 | Korea | Asian     | MAFLD |
| PRJEB40538 | ERR4634080 | Italy | Caucasian | MAFLD |
| PRJEB40538 | ERR4634087 | Italy | Caucasian | MAFLD |
| PRJEB40538 | ERR4634089 | Italy | Caucasian | MAFLD |
| PRJEB40538 | ERR4634115 | Italy | Caucasian | MAFLD |
| PRJEB40538 | ERR4634117 | Italy | Caucasian | MAFLD |
| PRJEB40538 | ERR4634119 | Italy | Caucasian | MAFLD |
| PRJEB40538 | ERR4634122 | Italy | Caucasian | MAFLD |
| PRJEB40538 | ERR4634124 | Italy | Caucasian | MAFLD |

|             |             |         |           |       |
|-------------|-------------|---------|-----------|-------|
| PRJEB40538  | ERR4634126  | Italy   | Caucasian | MAFLD |
| PRJEB40538  | ERR4634130  | Italy   | Caucasian | MAFLD |
| PRJEB40538  | ERR4634131  | Italy   | Caucasian | MAFLD |
| PRJEB40538  | ERR4634133  | Italy   | Caucasian | MAFLD |
| PRJEB40538  | ERR4634135  | Italy   | Caucasian | MAFLD |
| PRJEB40538  | ERR4634146  | Italy   | Caucasian | MAFLD |
| PRJEB40538  | ERR4634148  | Italy   | Caucasian | MAFLD |
| PRJEB40538  | ERR4634150  | Italy   | Caucasian | MAFLD |
| PRJEB40538  | ERR4634151  | Italy   | Caucasian | MAFLD |
| PRJEB40538  | ERR4634161  | Italy   | Caucasian | MAFLD |
| PRJEB40538  | ERR4634226  | Italy   | Caucasian | MAFLD |
| PRJEB40538  | ERR4634228  | Italy   | Caucasian | MAFLD |
| PRJEB40538  | ERR4634230  | Italy   | Caucasian | MAFLD |
| PRJEB40538  | ERR4634232  | Italy   | Caucasian | MAFLD |
| PRJEB40538  | ERR4634234  | Italy   | Caucasian | MAFLD |
| PRJEB40538  | ERR4634236  | Italy   | Caucasian | MAFLD |
| PRJEB40538  | ERR4634238  | Italy   | Caucasian | MAFLD |
| PRJEB40538  | ERR4634240  | Italy   | Caucasian | MAFLD |
| PRJEB40538  | ERR4634246  | Italy   | Caucasian | MAFLD |
| PRJNA540838 | SRR10918251 | Germany | Caucasian | MAFLD |
| PRJNA540839 | SRR10918252 | Germany | Caucasian | MAFLD |
| PRJNA540840 | SRR10918253 | Germany | Caucasian | MAFLD |
| PRJNA540841 | SRR10918254 | Germany | Caucasian | MAFLD |
| PRJNA540842 | SRR10918255 | Germany | Caucasian | MAFLD |
| PRJNA540843 | SRR10918256 | Germany | Caucasian | MAFLD |
| PRJNA540844 | SRR10918257 | Germany | Caucasian | MAFLD |
| PRJNA540845 | SRR10918258 | Germany | Caucasian | MAFLD |
| PRJNA540846 | SRR10918259 | Germany | Caucasian | MAFLD |
| PRJNA540847 | SRR10918260 | Germany | Caucasian | MAFLD |
| PRJNA540848 | SRR10918261 | Germany | Caucasian | MAFLD |
| PRJNA540849 | SRR10918262 | Germany | Caucasian | MAFLD |
| PRJNA540850 | SRR10918263 | Germany | Caucasian | MAFLD |
| PRJNA540851 | SRR10918264 | Germany | Caucasian | MAFLD |
| PRJNA540852 | SRR10918265 | Germany | Caucasian | MAFLD |
| PRJNA540853 | SRR10918266 | Germany | Caucasian | MAFLD |
| PRJNA540854 | SRR10918267 | Germany | Caucasian | MAFLD |
| PRJNA540855 | SRR10918268 | Germany | Caucasian | MAFLD |
| PRJNA540856 | SRR10918269 | Germany | Caucasian | MAFLD |
| PRJNA540857 | SRR10918270 | Germany | Caucasian | MAFLD |
| PRJNA540858 | SRR10918271 | Germany | Caucasian | MAFLD |
| PRJNA540859 | SRR10918272 | Germany | Caucasian | MAFLD |
| PRJNA540860 | SRR10918273 | Germany | Caucasian | MAFLD |
| PRJNA540861 | SRR10918274 | Germany | Caucasian | MAFLD |
| PRJNA540862 | SRR10918275 | Germany | Caucasian | MAFLD |
| PRJNA540863 | SRR10918276 | Germany | Caucasian | MAFLD |
| PRJNA540864 | SRR10918277 | Germany | Caucasian | MAFLD |

|             |             |           |         |           |        |
|-------------|-------------|-----------|---------|-----------|--------|
| PRJNA540865 | SRR10918278 |           | Germany | Caucasian | MAFLD  |
| PRJNA540866 | SRR10918279 |           | Germany | Caucasian | MAFLD  |
| PRJNA540867 | SRR10918280 |           | Germany | Caucasian | MAFLD  |
| PRJNA540868 | SRR10918281 |           | Germany | Caucasian | MAFLD  |
| PRJNA540869 | SRR10918282 |           | Germany | Caucasian | MAFLD  |
| PRJNA540870 | SRR10918283 |           | Germany | Caucasian | MAFLD  |
| PRJNA540871 | SRR10918284 |           | Germany | Caucasian | MAFLD  |
| PRJNA540872 | SRR10918285 |           | Germany | Caucasian | MAFLD  |
| PRJNA540873 | SRR10918286 |           | Germany | Caucasian | MAFLD  |
| PRJNA540874 | SRR10918287 |           | Germany | Caucasian | MAFLD  |
| PRJNA540875 | SRR10918288 |           | Germany | Caucasian | MAFLD  |
| PRJNA540876 | SRR10918289 |           | Germany | Caucasian | MAFLD  |
| PRJNA540877 | SRR10918290 |           | Germany | Caucasian | MAFLD  |
| PRJNA540878 | SRR10918291 |           | Germany | Caucasian | MAFLD  |
| PRJNA540879 | SRR10918292 |           | Germany | Caucasian | MAFLD  |
| PRJNA540880 | SRR10918293 |           | Germany | Caucasian | MAFLD  |
| PRJNA540881 | SRR10918294 |           | Germany | Caucasian | MAFLD  |
| PRJNA540752 | SRR11193324 |           | Germany | Caucasian | MAFLD  |
| PRJNA540751 | SRR11193325 |           | Germany | Caucasian | MAFLD  |
| PRJNA540750 | SRR11193326 |           | Germany | Caucasian | MAFLD  |
| PRJNA540749 | SRR11193327 |           | Germany | Caucasian | MAFLD  |
| PRJNA540748 | SRR11193336 |           | Germany | Caucasian | Health |
| PRJNA540747 | SRR11193337 |           | Germany | Caucasian | Health |
| PRJNA540746 | SRR11193356 |           | Germany | Caucasian | Health |
| PRJNA540761 | SRR11193358 |           | Germany | Caucasian | MAFLD  |
| PRJNA540760 | SRR11193362 |           | Germany | Caucasian | MAFLD  |
| PRJNA540745 | SRR11193363 |           | Germany | Caucasian | Health |
| PRJNA540744 | SRR11193364 |           | Germany | Caucasian | Health |
| PRJNA540743 | SRR11193365 |           | Germany | Caucasian | Health |
| PRJNA540742 | SRR11193366 |           | Germany | Caucasian | Health |
| PRJNA540740 | SRR11193368 |           | Germany | Caucasian | Health |
| PRJNA540739 | SRR11193369 |           | Germany | Caucasian | Health |
| PRJNA540741 | SRR11193370 |           | Germany | Caucasian | Health |
| PRJNA540738 | SRR11193372 |           | Germany | Caucasian | Health |
| PRJNA540759 | SRR11193373 |           | Germany | Caucasian | MAFLD  |
| PRJNA540758 | SRR11193374 |           | Germany | Caucasian | MAFLD  |
| PRJNA540757 | SRR11193375 |           | Germany | Caucasian | MAFLD  |
| PRJNA540756 | SRR11193376 |           | Germany | Caucasian | MAFLD  |
| PRJNA540755 | SRR11193377 |           | Germany | Caucasian | MAFLD  |
| PRJNA540754 | SRR11193378 |           | Germany | Caucasian | MAFLD  |
| PRJNA540753 | SRR11193379 |           | Germany | Caucasian | MAFLD  |
| PRJNA246121 | SRR1273255  | 58 Female | China   | Asian     | MAFLD  |
| PRJNA246121 | SRR1273259  | 40 Male   | China   | Asian     | MAFLD  |
| PRJNA246121 | SRR1273261  | 22 Male   | China   | Asian     | MAFLD  |
| PRJNA246121 | SRR1273263  | 37 Male   | China   | Asian     | MAFLD  |
| PRJNA246121 | SRR1273265  | 22 Male   | China   | Asian     | MAFLD  |

|             |            |           |       |       |       |
|-------------|------------|-----------|-------|-------|-------|
| PRJNA246121 | SRR1273267 | 58 Female | China | Asian | MAFLD |
| PRJNA246121 | SRR1273268 | 56 Female | China | Asian | MAFLD |
| PRJNA246121 | SRR1273270 | 34 Male   | China | Asian | MAFLD |
| PRJNA246121 | SRR1273272 | 31 Male   | China | Asian | MAFLD |
| PRJNA246121 | SRR1273273 | 49 Female | China | Asian | MAFLD |
| PRJNA246121 | SRR1273275 | 50 Male   | China | Asian | MAFLD |
| PRJNA246121 | SRR1273277 | 34 Male   | China | Asian | MAFLD |
| PRJNA246121 | SRR1273279 | 41 Male   | China | Asian | MAFLD |
| PRJNA246121 | SRR1273281 | 55 Female | China | Asian | MAFLD |
| PRJNA246121 | SRR1273282 | 49 Male   | China | Asian | MAFLD |
| PRJNA246121 | SRR1273284 | 50 Female | China | Asian | MAFLD |
| PRJNA246121 | SRR1273285 | 62 Male   | China | Asian | MAFLD |
| PRJNA246121 | SRR1273287 | 57 Male   | China | Asian | MAFLD |
| PRJNA246121 | SRR1273289 | 37 Male   | China | Asian | MAFLD |
| PRJNA246121 | SRR1273290 | 50 Male   | China | Asian | MAFLD |
| PRJNA246121 | SRR1273291 | 36 Male   | China | Asian | MAFLD |
| PRJNA246121 | SRR1273292 | 53 Male   | China | Asian | MAFLD |
| PRJNA246121 | SRR1273294 | 59 Female | China | Asian | MAFLD |
| PRJNA246121 | SRR1273302 | 72 Male   | China | Asian | MAFLD |
| PRJNA246121 | SRR1273317 | 37 Female | China | Asian | MAFLD |
| PRJNA246121 | SRR1273337 | 62 Female | China | Asian | MAFLD |
| PRJNA246121 | SRR1273342 | 59 Male   | China | Asian | MAFLD |
| PRJNA246121 | SRR1273343 | 59 Male   | China | Asian | MAFLD |
| PRJNA246121 | SRR1273344 | 28 Female | China | Asian | MAFLD |
| PRJNA246121 | SRR1273345 | 58 Female | China | Asian | MAFLD |
| PRJNA246121 | SRR1273346 | 71 Male   | China | Asian | MAFLD |
| PRJNA246121 | SRR1273347 | 54 Female | China | Asian | MAFLD |
| PRJNA246121 | SRR1273348 | 56 Male   | China | Asian | MAFLD |
| PRJNA246121 | SRR1273349 | 46 Female | China | Asian | MAFLD |
| PRJNA246121 | SRR1273350 | 52 Female | China | Asian | MAFLD |
| PRJNA246121 | SRR1273351 | 50 Male   | China | Asian | MAFLD |
| PRJNA246121 | SRR1273352 | 72 Female | China | Asian | MAFLD |
| PRJNA246121 | SRR1273353 | 45 Female | China | Asian | MAFLD |
| PRJNA246121 | SRR1273354 | 46 Female | China | Asian | MAFLD |
| PRJNA246121 | SRR1273355 | 50 Female | China | Asian | MAFLD |
| PRJNA246121 | SRR1273356 | 41 Male   | China | Asian | MAFLD |
| PRJNA246121 | SRR1273357 | 52 Female | China | Asian | MAFLD |
| PRJNA246121 | SRR1273358 | 56 Female | China | Asian | MAFLD |
| PRJNA246121 | SRR1273359 | 49 Female | China | Asian | MAFLD |
| PRJNA246121 | SRR1273360 | 41 Male   | China | Asian | MAFLD |
| PRJNA246121 | SRR1273361 | 48 Male   | China | Asian | MAFLD |
| PRJNA246121 | SRR1273362 | 44 Male   | China | Asian | MAFLD |
| PRJNA246121 | SRR1273363 | 54 Male   | China | Asian | MAFLD |
| PRJNA246121 | SRR1273364 | 38 Female | China | Asian | MAFLD |
| PRJNA246121 | SRR1273365 | 39 Female | China | Asian | MAFLD |
| PRJNA246121 | SRR1273366 | 35 Female | China | Asian | MAFLD |

|             |            |           |            |           |        |
|-------------|------------|-----------|------------|-----------|--------|
| PRJNA246121 | SRR1273367 | 38 Female | China      | Asian     | MAFLD  |
| PRJNA246121 | SRR1273368 | 40 Female | China      | Asian     | MAFLD  |
| PRJNA246121 | SRR1273369 | 45 Female | China      | Asian     | Health |
| PRJNA246121 | SRR1273370 | 39 Female | China      | Asian     | Health |
| PRJNA246121 | SRR1273371 | 34 Female | China      | Asian     | Health |
| PRJNA246121 | SRR1273372 | 40 Female | China      | Asian     | Health |
| PRJNA246121 | SRR1273373 | 38 Female | China      | Asian     | Health |
| PRJNA246121 | SRR1273374 | 51 Female | China      | Asian     | Health |
| PRJNA246121 | SRR1273375 | 42 Female | China      | Asian     | Health |
| PRJNA246121 | SRR1273376 | 43 Female | China      | Asian     | Health |
| PRJNA246121 | SRR1273377 | 50 Female | China      | Asian     | Health |
| PRJNA246121 | SRR1273378 | 41 Male   | China      | Asian     | Health |
| PRJNA246121 | SRR1273379 | 52 Female | China      | Asian     | Health |
| PRJNA246121 | SRR1273380 | 44 Female | China      | Asian     | Health |
| PRJNA246121 | SRR1273381 | 41 Female | China      | Asian     | Health |
| PRJNA246121 | SRR1273382 | 40 Male   | China      | Asian     | Health |
| PRJNA246121 | SRR1273383 | 42 Female | China      | Asian     | Health |
| PRJNA246121 | SRR1273384 | 38 Male   | China      | Asian     | Health |
| PRJNA246121 | SRR1273385 | 40 Female | China      | Asian     | Health |
| PRJNA246121 | SRR1273389 | 26 Female | China      | Asian     | Health |
| PRJNA246121 | SRR1273390 | 41 Female | China      | Asian     | Health |
| PRJNA246121 | SRR1273391 | 40 Female | China      | Asian     | Health |
| PRJNA246121 | SRR1273392 | 50 Female | China      | Asian     | Health |
| PRJNA246121 | SRR1273393 | 39 Female | China      | Asian     | Health |
| PRJNA246121 | SRR1273394 | 43 Female | China      | Asian     | Health |
| PRJNA246121 | SRR1273396 | 33 Female | China      | Asian     | Health |
| PRJNA246121 | SRR1273397 | 35 Female | China      | Asian     | Health |
| PRJNA246121 | SRR1273398 | 40 Male   | China      | Asian     | Health |
| PRJNA246121 | SRR1273399 | 43 Female | China      | Asian     | Health |
| PRJNA246121 | SRR1273400 | 35 Female | China      | Asian     | Health |
| PRJNA246121 | SRR1273401 | 42 Female | China      | Asian     | Health |
| PRJNA246121 | SRR1273402 | 42 Female | China      | Asian     | Health |
| PRJNA246121 | SRR1273403 | 28 Male   | China      | Asian     | Health |
| PRJNA246121 | SRR1273404 | 47 Female | China      | Asian     | Health |
| PRJNA401981 | SRR6024843 | 41 Female | 22.2 Italy | Caucasian | Health |
| PRJNA401981 | SRR6024844 | 44 Female | 21.4 Italy | Caucasian | Health |
| PRJNA401981 | SRR6024845 | 49 Female | 19.1 Italy | Caucasian | Health |
| PRJNA401981 | SRR6024846 | 46 Female | 24.6 Italy | Caucasian | Health |
| PRJNA401981 | SRR6024847 | 55 Female | 24.4 Italy | Caucasian | Health |
| PRJNA401981 | SRR6024848 | 51 Female | 23.1 Italy | Caucasian | Health |
| PRJNA401981 | SRR6024849 | 62 Female | 22.1 Italy | Caucasian | Health |
| PRJNA401981 | SRR6024850 | 44 Female | 23.1 Italy | Caucasian | Health |
| PRJNA401981 | SRR6024853 | 35 Male   | 24.7 Italy | Caucasian | Health |
| PRJNA401981 | SRR6024854 | 38 Male   | 22.2 Italy | Caucasian | Health |
| PRJNA401981 | SRR6024855 | 42 Male   | 24.2 Italy | Caucasian | Health |
| PRJNA401981 | SRR6024856 | 38 Male   | 22.1 Italy | Caucasian | Health |

|             |            |           |                  |           |        |
|-------------|------------|-----------|------------------|-----------|--------|
| PRJNA401981 | SRR6024857 | 58 Male   | 22.6 Italy       | Caucasian | Health |
| PRJNA401981 | SRR6024858 | 51 Male   | 20.5 Italy       | Caucasian | Health |
| PRJNA401981 | SRR6024859 | 56 Male   | 25.8 Italy       | Caucasian | Health |
| PRJNA401981 | SRR6024860 | 60 Male   | 19.4 Italy       | Caucasian | Health |
| PRJNA401981 | SRR6024861 | 46 Male   | 24.8 Italy       | Caucasian | Health |
| PRJNA401981 | SRR6024862 | 63 Male   | 23.6 Italy       | Caucasian | Health |
| PRJNA414683 | SRR6185168 | 59 Male   | 28.4 New Zealand | Caucasian | Health |
| PRJNA414683 | SRR6185180 | 40 Male   | 27.1 New Zealand | Caucasian | Health |
| PRJNA414683 | SRR6185189 | 59 Male   | 28.4 New Zealand | Caucasian | Health |
| PRJNA414683 | SRR6185204 | 59 Male   | 28.4 New Zealand | Caucasian | Health |
| PRJNA414683 | SRR6185211 | 40 Male   | 27.1 New Zealand | Caucasian | Health |
| PRJNA414683 | SRR6185233 | 33 Female | 26.5 New Zealand | Caucasian | Health |
| PRJNA414683 | SRR6185239 | 34 Male   | 27.3 New Zealand | Caucasian | Health |
| PRJNA414683 | SRR6185241 | 59 Male   | 28.4 New Zealand | Caucasian | Health |
| PRJNA414683 | SRR6185244 | 33 Female | 26.5 New Zealand | Caucasian | Health |
| PRJNA414683 | SRR6185260 | 40 Male   | 27.1 New Zealand | Caucasian | Health |
| PRJNA414683 | SRR6185268 | 33 Female | 26.5 New Zealand | Caucasian | Health |
| PRJNA414683 | SRR6185271 | 34 Male   | 27.3 New Zealand | Caucasian | Health |
| PRJNA414683 | SRR6185276 | 40 Male   | 27.1 New Zealand | Caucasian | Health |
| PRJNA414683 | SRR6185280 | 34 Male   | 27.3 New Zealand | Caucasian | Health |
| PRJNA414683 | SRR6185287 | 33 Female | 26.5 New Zealand | Caucasian | Health |
| PRJNA414683 | SRR6185294 | 34 Male   | 27.3 New Zealand | Caucasian | Health |
| PRJNA518731 | SRR8518981 |           | New Zealand      | Caucasian | MAFLD  |
| PRJNA518731 | SRR8518983 |           | New Zealand      | Caucasian | MAFLD  |
| PRJNA518731 | SRR8518987 |           | New Zealand      | Caucasian | MAFLD  |
| PRJNA518731 | SRR8518988 |           | New Zealand      | Caucasian | MAFLD  |
| PRJNA518731 | SRR8518990 |           | New Zealand      | Caucasian | MAFLD  |
| PRJNA518731 | SRR8518998 |           | New Zealand      | Caucasian | MAFLD  |
| PRJNA518731 | SRR8519001 |           | New Zealand      | Caucasian | MAFLD  |
| PRJNA518731 | SRR8519002 |           | New Zealand      | Caucasian | MAFLD  |
| PRJNA518731 | SRR8519003 |           | New Zealand      | Caucasian | MAFLD  |
| PRJNA518731 | SRR8519013 |           | New Zealand      | Caucasian | MAFLD  |
| PRJNA518731 | SRR8519019 |           | New Zealand      | Caucasian | MAFLD  |
| PRJNA518731 | SRR8519022 |           | New Zealand      | Caucasian | MAFLD  |
| PRJNA518731 | SRR8519023 |           | New Zealand      | Caucasian | MAFLD  |
| PRJNA518731 | SRR8519028 |           | New Zealand      | Caucasian | MAFLD  |
| PRJNA518731 | SRR8519029 |           | New Zealand      | Caucasian | MAFLD  |
| PRJNA518731 | SRR8519031 |           | New Zealand      | Caucasian | MAFLD  |
| PRJNA518731 | SRR8519032 |           | New Zealand      | Caucasian | MAFLD  |
| PRJNA518731 | SRR8519036 |           | New Zealand      | Caucasian | MAFLD  |
| PRJNA518731 | SRR8519038 |           | New Zealand      | Caucasian | MAFLD  |
| PRJNA518731 | SRR8519041 |           | New Zealand      | Caucasian | MAFLD  |
| PRJNA518731 | SRR8519046 |           | New Zealand      | Caucasian | MAFLD  |
| PRJNA518731 | SRR8519050 |           | New Zealand      | Caucasian | MAFLD  |
| PRJNA518731 | SRR8519051 |           | New Zealand      | Caucasian | MAFLD  |
| PRJNA518731 | SRR8519056 |           | New Zealand      | Caucasian | MAFLD  |

|             |            |             |           |        |
|-------------|------------|-------------|-----------|--------|
| PRJNA518731 | SRR8519057 | New Zealand | Caucasian | MAFLD  |
| PRJNA518731 | SRR8519062 | New Zealand | Caucasian | MAFLD  |
| PRJNA518731 | SRR8519066 | New Zealand | Caucasian | MAFLD  |
| PRJNA518731 | SRR8519072 | New Zealand | Caucasian | MAFLD  |
| PRJNA518731 | SRR8519076 | New Zealand | Caucasian | MAFLD  |
| PRJNA518731 | SRR8519086 | New Zealand | Caucasian | MAFLD  |
| PRJNA518731 | SRR8519089 | New Zealand | Caucasian | MAFLD  |
| PRJNA518731 | SRR8519093 | New Zealand | Caucasian | MAFLD  |
| PRJNA518731 | SRR8519099 | New Zealand | Caucasian | MAFLD  |
| PRJNA518731 | SRR8519101 | New Zealand | Caucasian | MAFLD  |
| PRJNA518731 | SRR8519103 | New Zealand | Caucasian | MAFLD  |
| PRJNA518731 | SRR8519104 | New Zealand | Caucasian | MAFLD  |
| PRJNA540790 | SRR9001634 | Germany     | Caucasian | MAFLD  |
| PRJNA540774 | SRR9001635 | Germany     | Caucasian | MAFLD  |
| PRJNA540769 | SRR9001639 | Germany     | Caucasian | Health |
| PRJNA540768 | SRR9001640 | Germany     | Caucasian | Health |
| PRJNA540767 | SRR9001641 | Germany     | Caucasian | Health |
| PRJNA540792 | SRR9001642 | Germany     | Caucasian | MAFLD  |
| PRJNA540791 | SRR9001643 | Germany     | Caucasian | MAFLD  |
| PRJNA540770 | SRR9001644 | Germany     | Caucasian | MAFLD  |
| PRJNA540772 | SRR9001646 | Germany     | Caucasian | MAFLD  |
| PRJNA540775 | SRR9001651 | Germany     | Caucasian | MAFLD  |
| PRJNA540773 | SRR9001652 | Germany     | Caucasian | MAFLD  |
| PRJNA540793 | SRR9001653 | Germany     | Caucasian | MAFLD  |
| PRJNA540794 | SRR9001654 | Germany     | Caucasian | MAFLD  |
| PRJNA540795 | SRR9001655 | Germany     | Caucasian | MAFLD  |
| PRJNA540796 | SRR9001656 | Germany     | Caucasian | MAFLD  |
| PRJNA540797 | SRR9001657 | Germany     | Caucasian | MAFLD  |
| PRJNA540798 | SRR9001658 | Germany     | Caucasian | MAFLD  |
| PRJNA540799 | SRR9001659 | Germany     | Caucasian | MAFLD  |
| PRJNA540800 | SRR9001660 | Germany     | Caucasian | MAFLD  |
| PRJNA540810 | SRR9001661 | Germany     | Caucasian | MAFLD  |
| PRJNA540811 | SRR9001662 | Germany     | Caucasian | MAFLD  |
| PRJNA540782 | SRR9001663 | Germany     | Caucasian | MAFLD  |
| PRJNA540783 | SRR9001664 | Germany     | Caucasian | MAFLD  |
| PRJNA540780 | SRR9001665 | Germany     | Caucasian | MAFLD  |
| PRJNA540781 | SRR9001666 | Germany     | Caucasian | MAFLD  |
| PRJNA540778 | SRR9001667 | Germany     | Caucasian | MAFLD  |
| PRJNA540779 | SRR9001668 | Germany     | Caucasian | MAFLD  |
| PRJNA540776 | SRR9001669 | Germany     | Caucasian | MAFLD  |
| PRJNA540777 | SRR9001670 | Germany     | Caucasian | MAFLD  |
| PRJNA540784 | SRR9001671 | Germany     | Caucasian | MAFLD  |
| PRJNA540785 | SRR9001672 | Germany     | Caucasian | MAFLD  |
| PRJNA540771 | SRR9001674 | Germany     | Caucasian | MAFLD  |
| PRJNA540762 | SRR9001676 | Germany     | Caucasian | Health |
| PRJNA540789 | SRR9001684 | Germany     | Caucasian | MAFLD  |



|             |            |         |           |        |
|-------------|------------|---------|-----------|--------|
| PRJNA540788 | SRR9001685 | Germany | Caucasian | MAFLD  |
| PRJNA540787 | SRR9001686 | Germany | Caucasian | MAFLD  |
| PRJNA540786 | SRR9001687 | Germany | Caucasian | MAFLD  |
| PRJNA540804 | SRR9001688 | Germany | Caucasian | MAFLD  |
| PRJNA540803 | SRR9001689 | Germany | Caucasian | MAFLD  |
| PRJNA540801 | SRR9001690 | Germany | Caucasian | MAFLD  |
| PRJNA540806 | SRR9001691 | Germany | Caucasian | MAFLD  |
| PRJNA540805 | SRR9001692 | Germany | Caucasian | MAFLD  |
| PRJNA540823 | SRR9001696 | Germany | Caucasian | MAFLD  |
| PRJNA540824 | SRR9001697 | Germany | Caucasian | MAFLD  |
| PRJNA540819 | SRR9001698 | Germany | Caucasian | MAFLD  |
| PRJNA540820 | SRR9001699 | Germany | Caucasian | MAFLD  |
| PRJNA540821 | SRR9001700 | Germany | Caucasian | MAFLD  |
| PRJNA540822 | SRR9001701 | Germany | Caucasian | MAFLD  |
| PRJNA540807 | SRR9001702 | Germany | Caucasian | MAFLD  |
| PRJNA540808 | SRR9001703 | Germany | Caucasian | MAFLD  |
| PRJNA540809 | SRR9001704 | Germany | Caucasian | MAFLD  |
| PRJNA540818 | SRR9001705 | Germany | Caucasian | MAFLD  |
| PRJNA540837 | SRR9001710 | Germany | Caucasian | MAFLD  |
| PRJNA540802 | SRR9001711 | Germany | Caucasian | MAFLD  |
| PRJNA540816 | SRR9001712 | Germany | Caucasian | MAFLD  |
| PRJNA540815 | SRR9001713 | Germany | Caucasian | MAFLD  |
| PRJNA540814 | SRR9001714 | Germany | Caucasian | MAFLD  |
| PRJNA540813 | SRR9001715 | Germany | Caucasian | MAFLD  |
| PRJNA540812 | SRR9001716 | Germany | Caucasian | MAFLD  |
| PRJNA540835 | SRR9001717 | Germany | Caucasian | MAFLD  |
| PRJNA540834 | SRR9001718 | Germany | Caucasian | MAFLD  |
| PRJNA540827 | SRR9001719 | Germany | Caucasian | MAFLD  |
| PRJNA540826 | SRR9001720 | Germany | Caucasian | MAFLD  |
| PRJNA540829 | SRR9001721 | Germany | Caucasian | MAFLD  |
| PRJNA540828 | SRR9001722 | Germany | Caucasian | MAFLD  |
| PRJNA540831 | SRR9001723 | Germany | Caucasian | MAFLD  |
| PRJNA540830 | SRR9001724 | Germany | Caucasian | MAFLD  |
| PRJNA540833 | SRR9001725 | Germany | Caucasian | MAFLD  |
| PRJNA540832 | SRR9001726 | Germany | Caucasian | MAFLD  |
| PRJNA540765 | SRR9001727 | Germany | Caucasian | Health |
| PRJNA540766 | SRR9001728 | Germany | Caucasian | Health |
| PRJNA540836 | SRR9001731 | Germany | Caucasian | MAFLD  |
| PRJNA540763 | SRR9001733 | Germany | Caucasian | Health |
| PRJNA540764 | SRR9001734 | Germany | Caucasian | Health |
| PRJNA540825 | SRR9016647 | Germany | Caucasian | MAFLD  |
| PRJNA540817 | SRR9016650 | Germany | Caucasian | MAFLD  |

**Supplementary table S3. Comparison of network topological data for gut microbiota between Healthy and MAFLD individuals**

|                            | <b>Health</b> | <b>MAFLD</b> |
|----------------------------|---------------|--------------|
| <b>No. Node</b>            | 131           | 130          |
| <b>No. Edge</b>            | 432           | 404          |
| <b>Average degree</b>      | 6.6           | 5.82         |
| <b>Average path length</b> | 0.79          | 1.17         |
| <b>Negative Edge Ratio</b> | 0.58          | 0.55         |
| <b>Robustness (50%)</b>    | 0.47          | 0.42         |

**Supplementary Table S4. Differential Network Parameters of P.copri Among Ethnicities Based on ET-P.**

|                               | <b>Asians</b> | <b>Caucaians</b> |
|-------------------------------|---------------|------------------|
| <b>Size</b>                   | 36.3596       | 31.8225          |
| <b>Degree</b>                 | 57            | 66               |
| <b>Weighted Degree</b>        | 14.1286       | 6.5946           |
| <b>Closeness Centrality</b>   | 0.565217      | 0.577103         |
| <b>Betweenness Centrality</b> | 0.003649      | 0.00666          |
| <b>PageRank</b>               | 0.015287      | 0.006528         |
| <b>Clustering Coefficient</b> | 0.408521      | 0.255944         |
| <b>Eigenvector Centrality</b> | 0.364104      | 0.34376          |
